# Supplementary material for: The androgen receptor—lncRNASAT1-AKT-p15 axis mediates androgen-induced cellular senescence in prostate cancer cells
Source: PubMed Central journal article supplement (PMC8837536; doi:10.1038/s41388-021-02060-5), 2021-10-19
Supplement: 41388_2021_2060_MOESM1_ESM.pdf [file 41388_2021_2060_MOESM1_ESM.pdf]

# Supplemental Figure

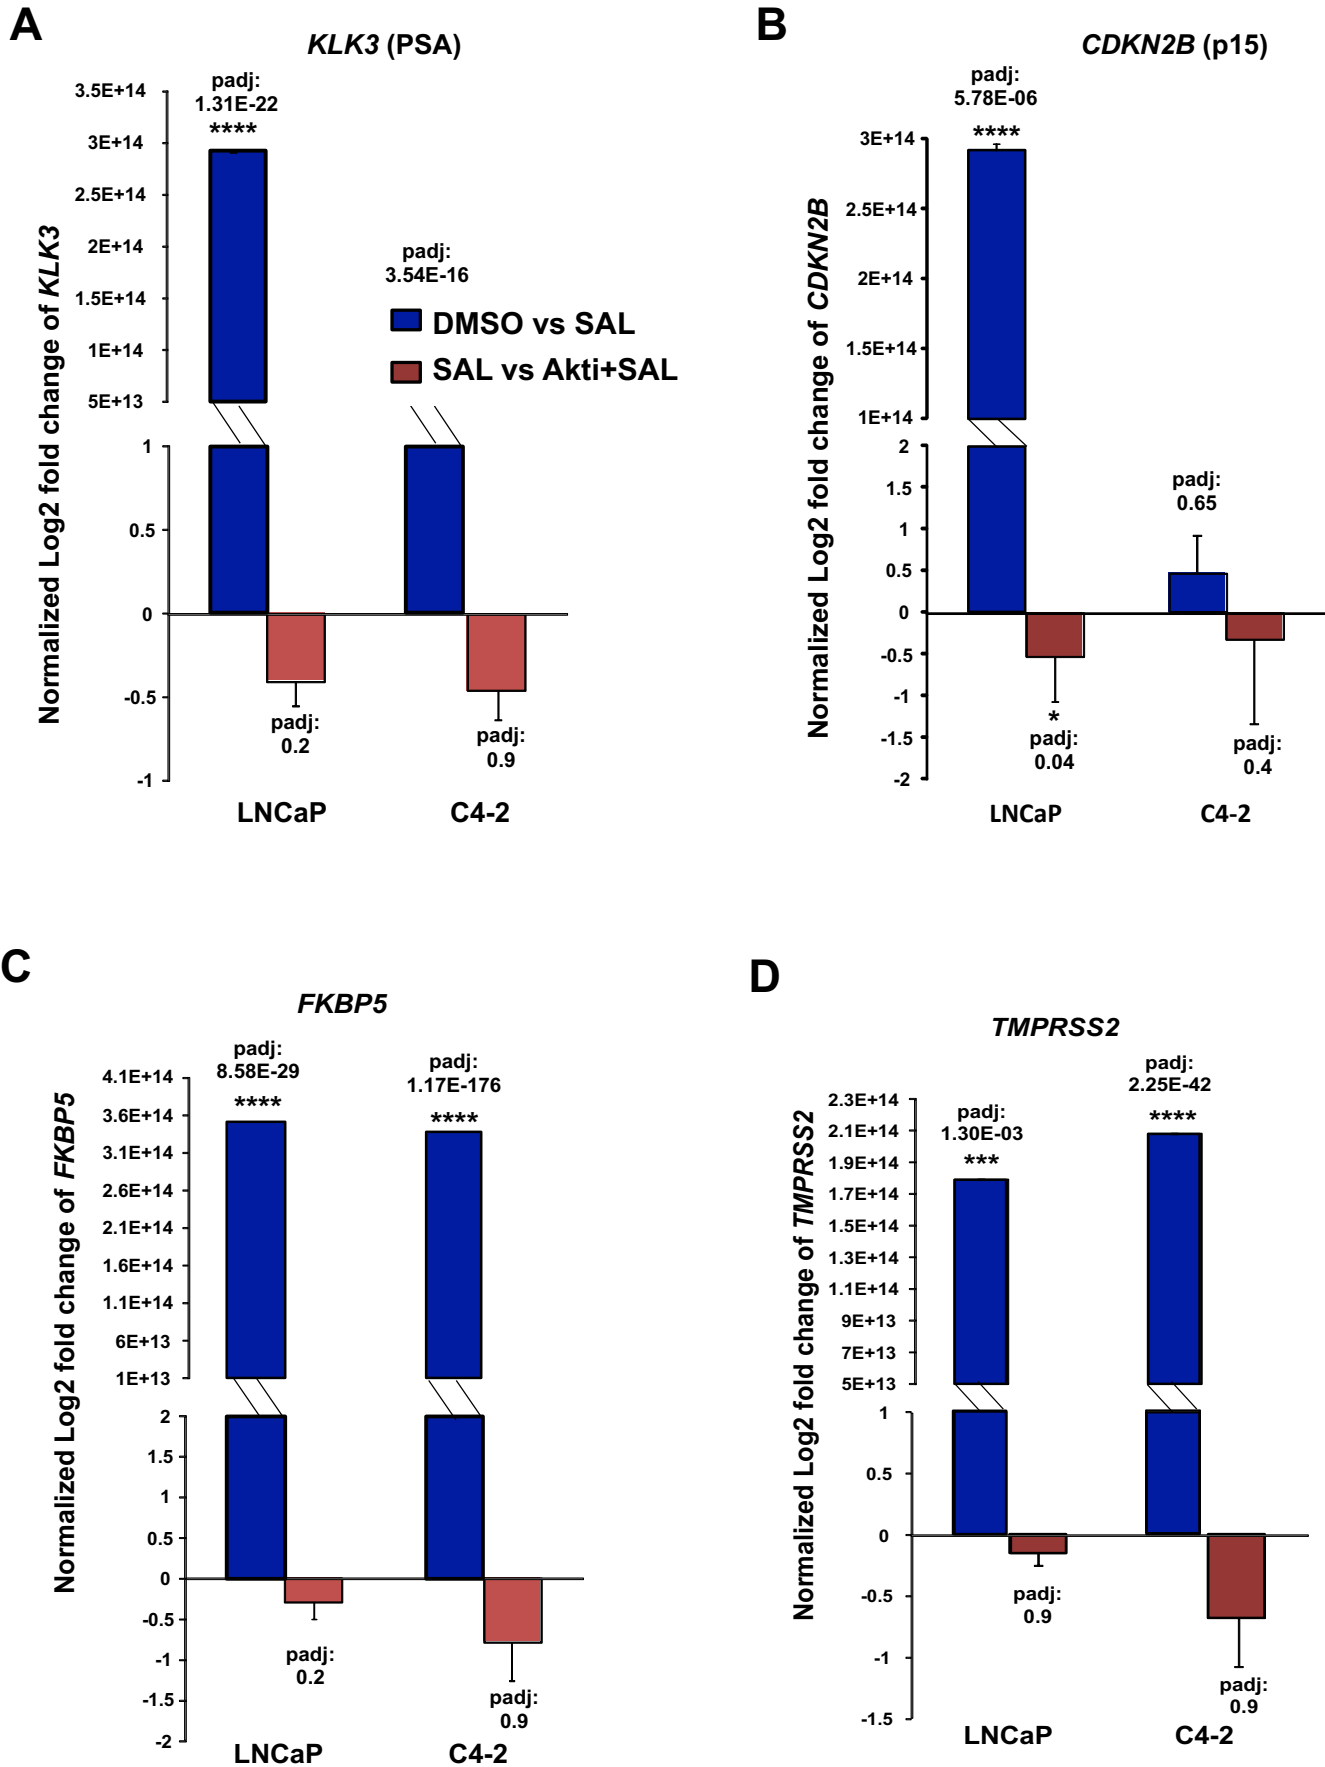

**Fig. S1 Differential expression analysis indicates AKTi significantly alters expression of most genes regulated by SAL.** Normalized log<sub>2</sub> fold change and significance of expression by the treatments of (A) *CDKN2B* encoding p15, (B) *KLK3* encoding PSA, (C) *TMPRSS2* and (D) *FKBP5* in both LNCaP and C4-2 cells. (n=3), \*\*\*padj≤0.001, \*\*\*\*padj≤0.0001
