# Supplementary material for: The androgen receptor—lncRNASAT1-AKT-p15 axis mediates androgen-induced cellular senescence in prostate cancer cells
Source: PubMed Central journal article supplement (PMC8837536; doi:10.1038/s41388-021-02060-5), 2021-10-19
Supplement: 41388_2021_2060_MOESM2_ESM.pdf [file 41388_2021_2060_MOESM2_ESM.pdf]

## Supplemental Figure

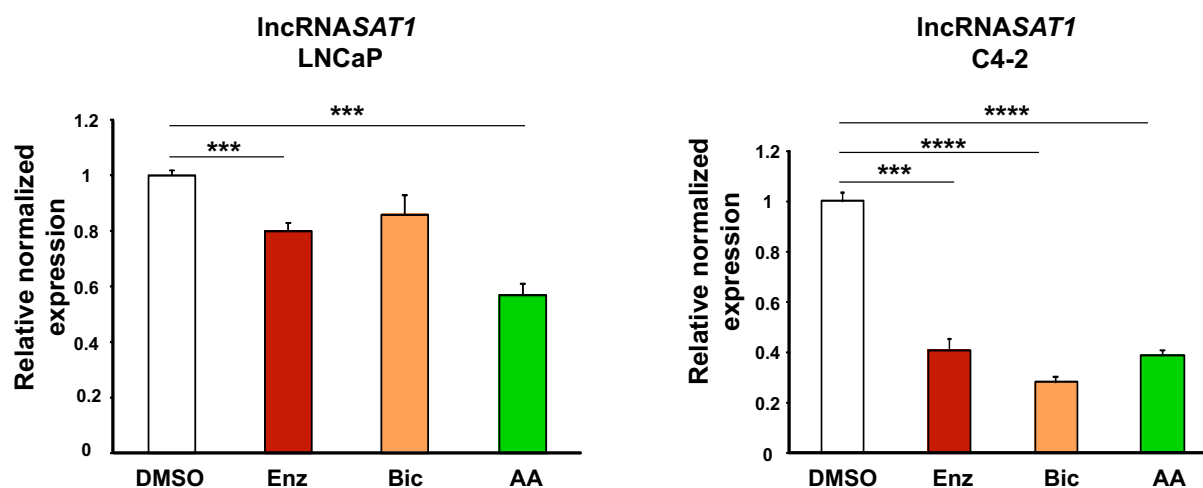

**Fig. S2. The expression of lncRNASAT1 is repressed by AR antagonists.** LNCaP and C4-2 cells were incubated for 72 h with DMSO as solvent control or different AR antagonist (Enzalutamide (Enz, 10  $\mu$ M), Bicalutamide (Bic, 10  $\mu$ M) and Atracuric acid (AA, 100  $\mu$ M). qRT-PCR was performed to analyze the expression of lncRNASAT1 in both LNCaP and C4-2 cells. Gene expression was normalized to *TBP* and *GAPDH3'* and the values for control samples. Error bars indicate the SEM of the mean of doublets. Three independent experiments were performed. Two-tailed unpaired Student's *t*-test was performed for statistical analysis (\* $p$ <0.05, \*\* $p$ <0.01, \*\*\* $p$ <0.001) compared to DMSO treatment.
