# Supplementary material for: The androgen receptor—lncRNASAT1-AKT-p15 axis mediates androgen-induced cellular senescence in prostate cancer cells
Source: PubMed Central journal article supplement (PMC8837536; doi:10.1038/s41388-021-02060-5), 2021-10-19
Supplement: 41388_2021_2060_MOESM4_ESM.pdf [file 41388_2021_2060_MOESM4_ESM.pdf]

## Supplemental Figure

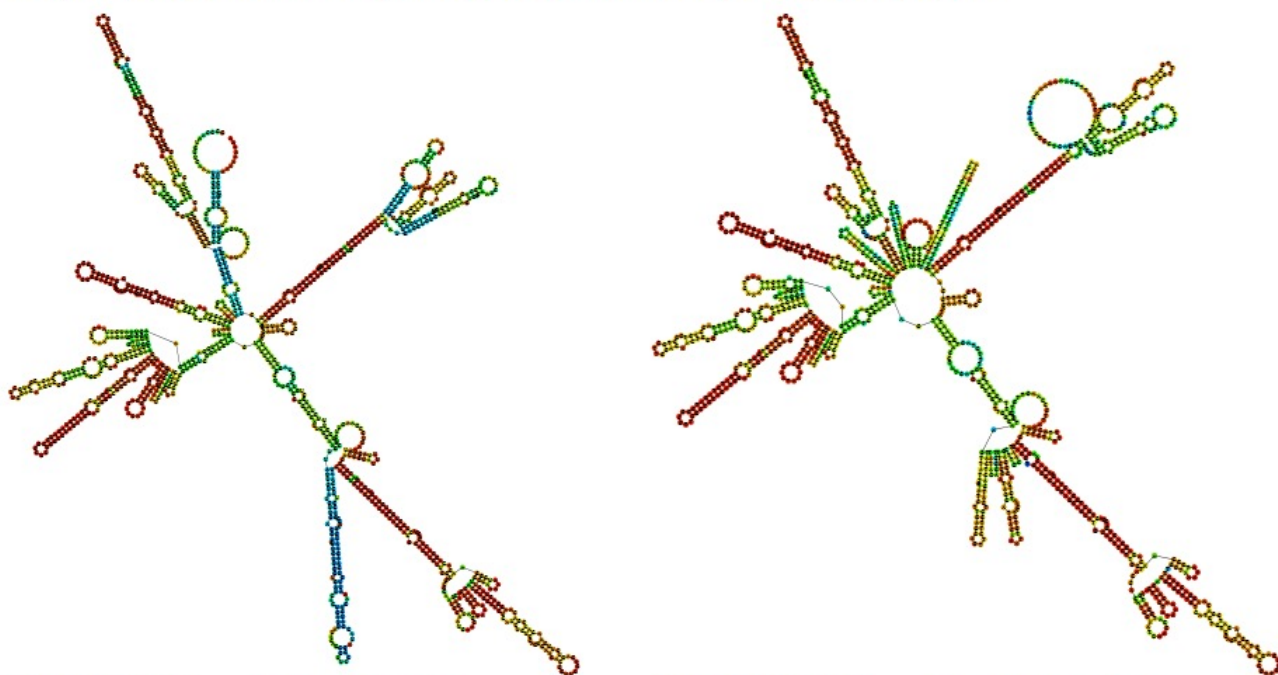

**Fig. S4. Predicted structure of the lncRNASAT1.** Prediction of two likely secondary structures of lncRNASAT1 using the *RNAfold* online web server. The interaction probabilities between lncRNASAT1 and protein AR were calculated by <http://pridb.gdcb.iastate.edu/RPISeq>.
